# Supplementary material
Source: PubMed Central journal article supplement (PMC5267930)
Supplement: NIHMS828636-supplement-1.pdf [file NIHMS828636-supplement-1.pdf]

# S1. Brain Metastases of Breast Cancer Model

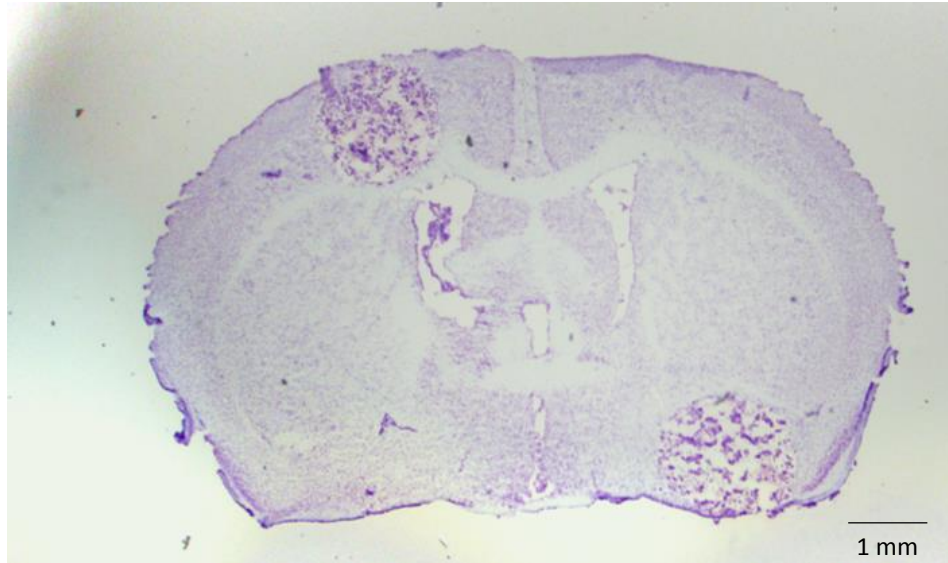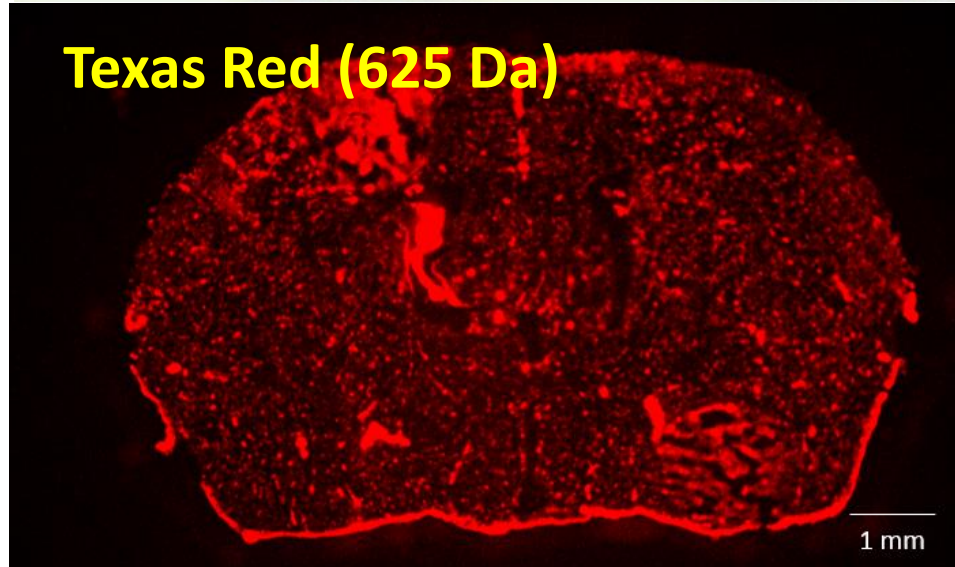

Tumor

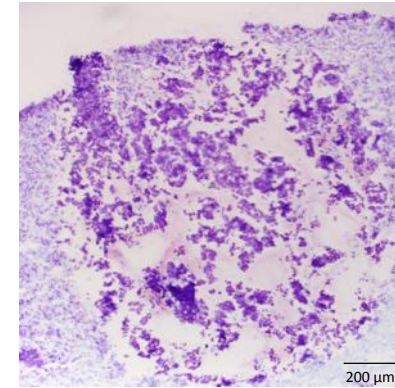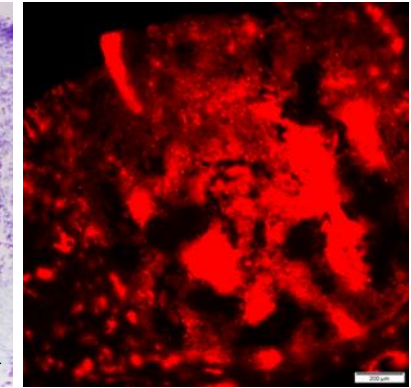

Normal Brain

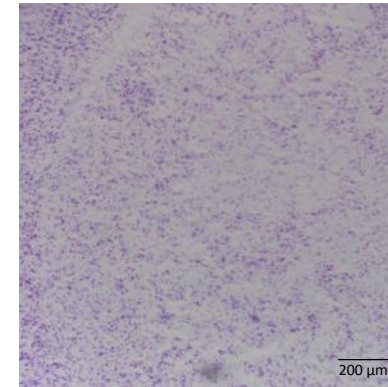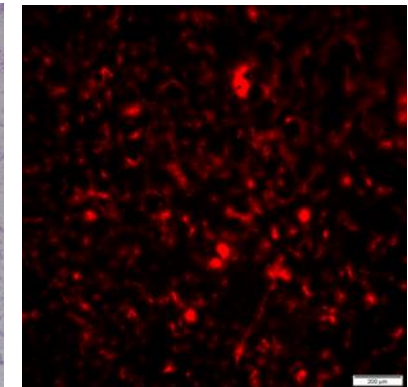

Representative images showing the histology (cresyl violet staining) and dye extravasation into the lesion

# S2. Brain Metastases of Breast Cancer Model

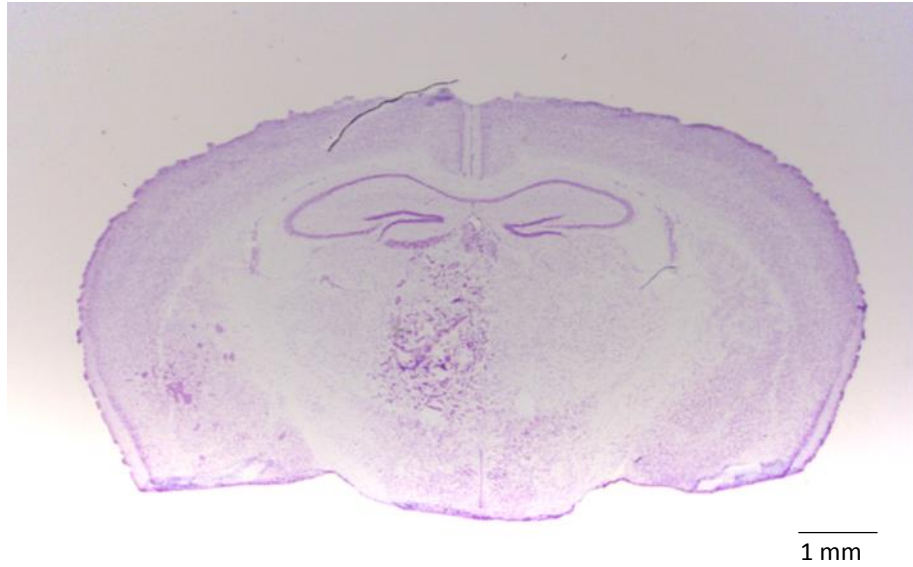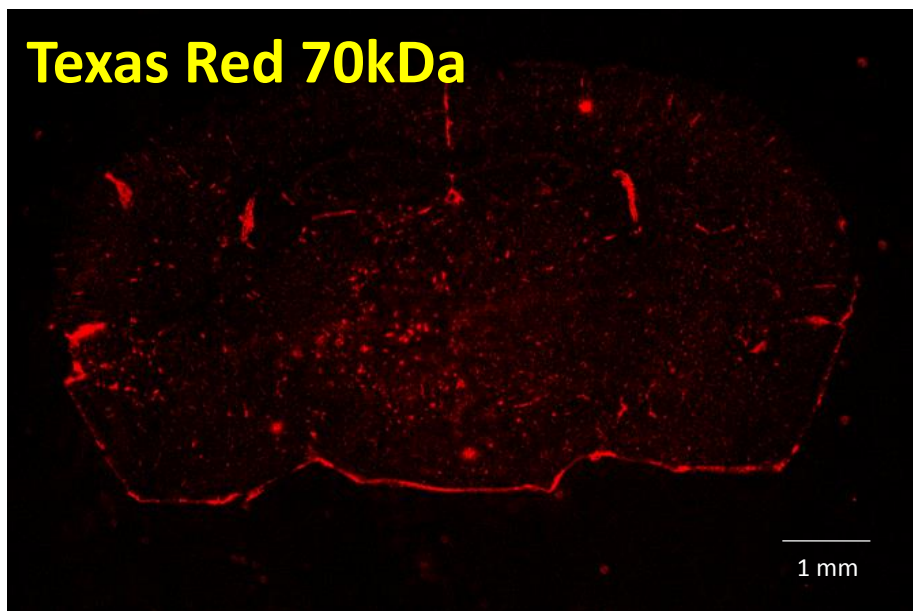

Tumor

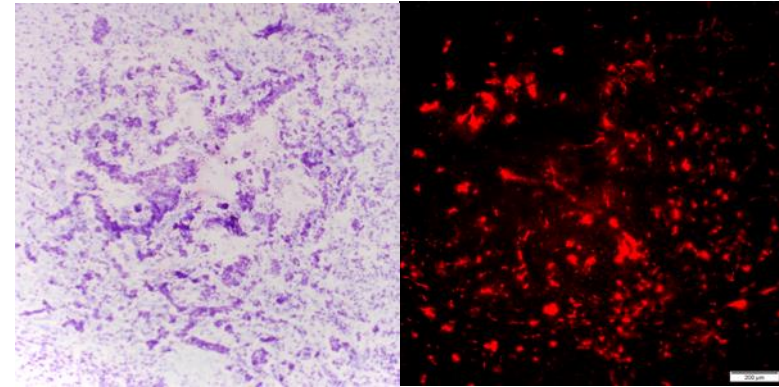

Normal Brain

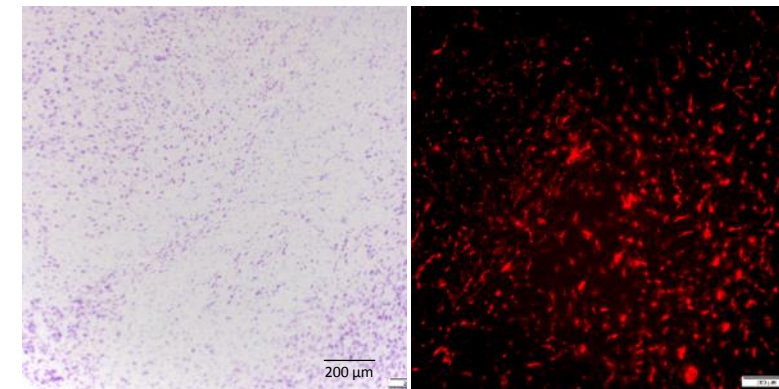

Representative images showing the histology (cresyl violet staining) and dye extravasation into the lesion

# S3. RG-2 Model

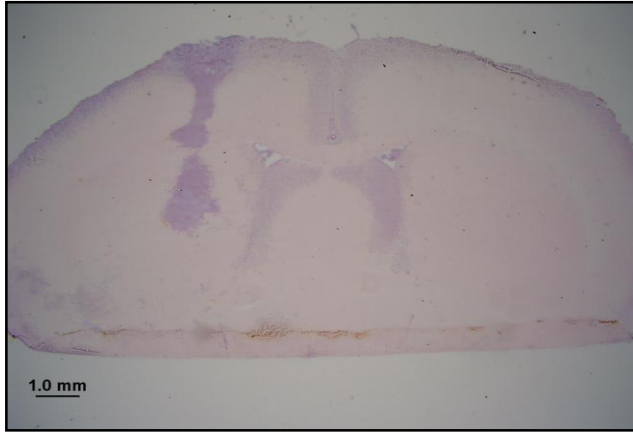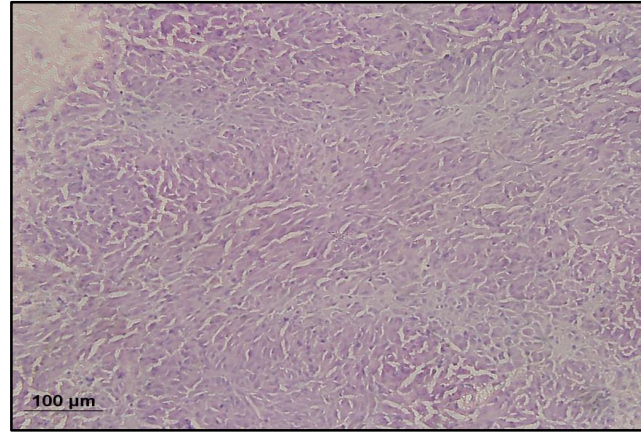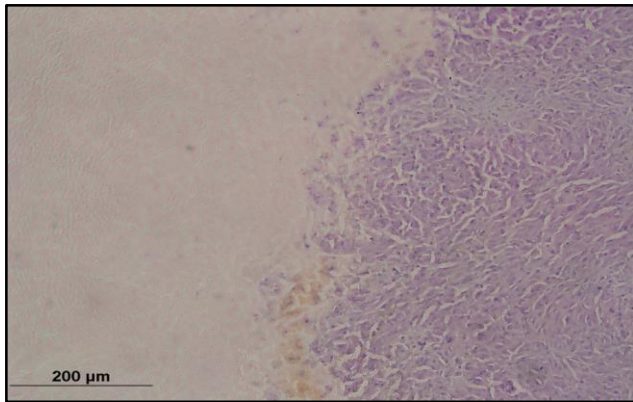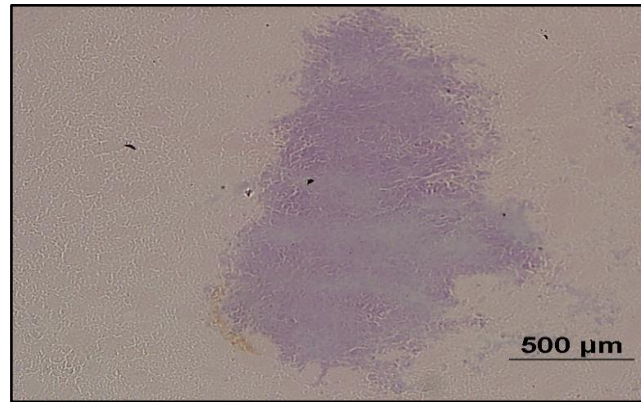

Normal Brain

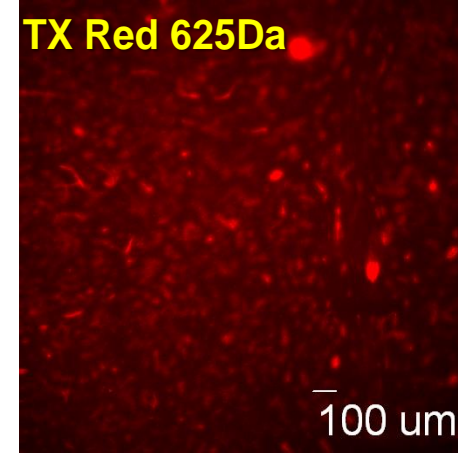

Tumor

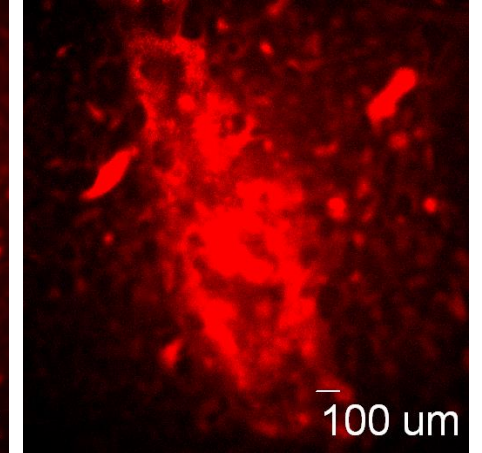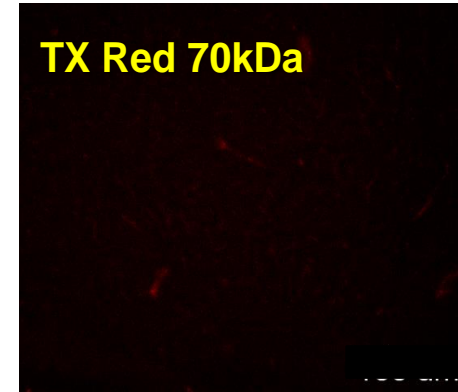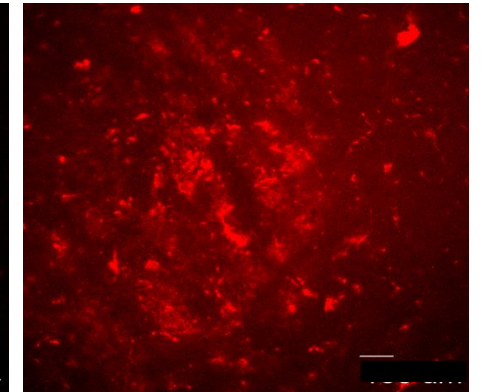

Representative images showing the histology (cresyl violet staining) and dye extravasation into the tumor
